# Supplementary material
Source: HighWire-hosted journal article supplement (https://jnm.snmjournals.org/highwire/filestream/93914/field_highwire_adjunct_files/1/Supplemental_Figure_2_JNM_44669_Klein.pdf)

Maps created using surface registration across all nine subjects  
Surfaces generated from unsmoothed datasets

Surface generated from 2D-smoothed individual datasets

CMRGlc

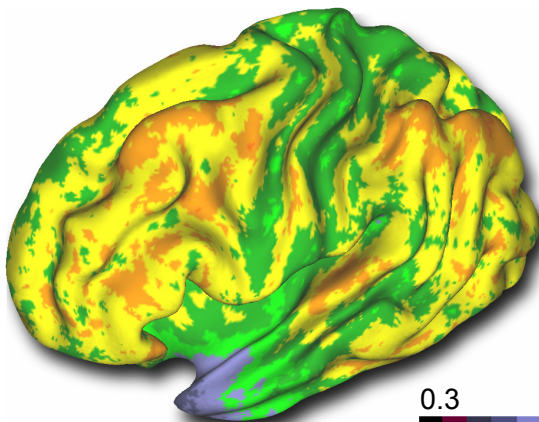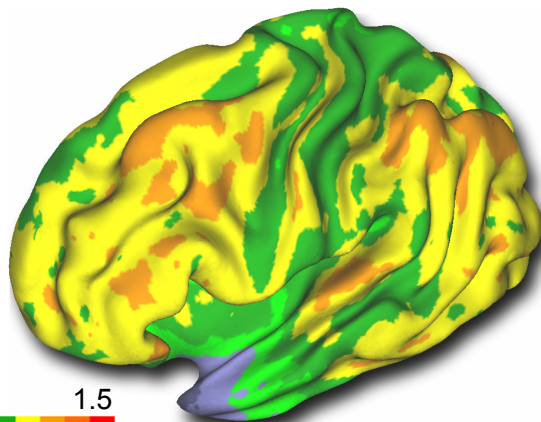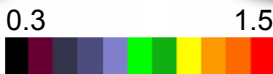

Standard deviation

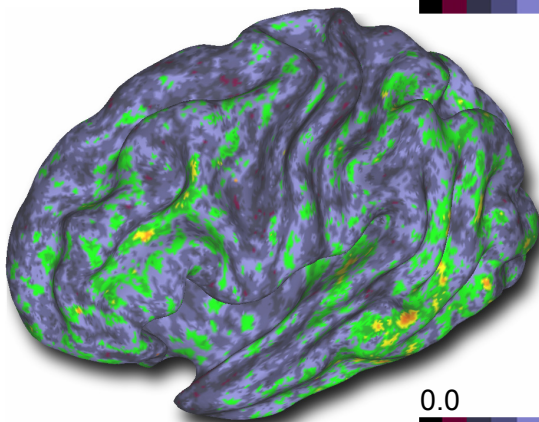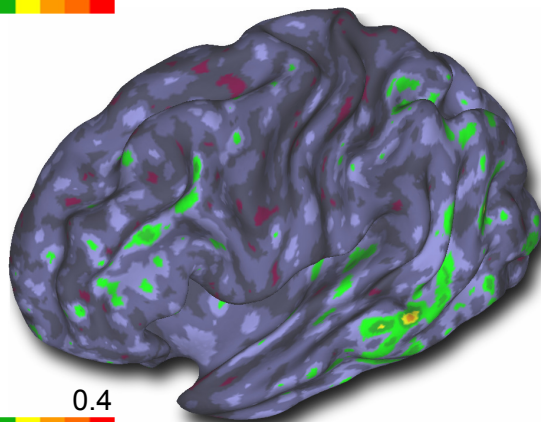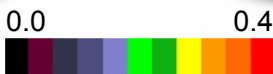

Supplement: Supplemental_Figure_2_JNM_44669_Klein.pdf [file Supplemental_Figure_2_JNM_44669_Klein.pdf]
